# Supplementary material
Source: publisher figshare collection journal article supplement (https://diabetesjournals.figshare.com/articles/dataset/_/19233129)

**Figure S2. Scatter plots displaying the IVW results in the multi-instrument MR analyses. A) PAM, B) PLXNB2, C) ERO1LB, D) LAMC1, E) MANBA, F) SVEP1, G) TNFRSF11A, H) APOA5, I) C1QTNF5, J) sICAM1, K) NEO1.** The blue line denotes the IVW regression. All the analyses have been performed using TwoSampleMR package in R software (version 4.1.1).

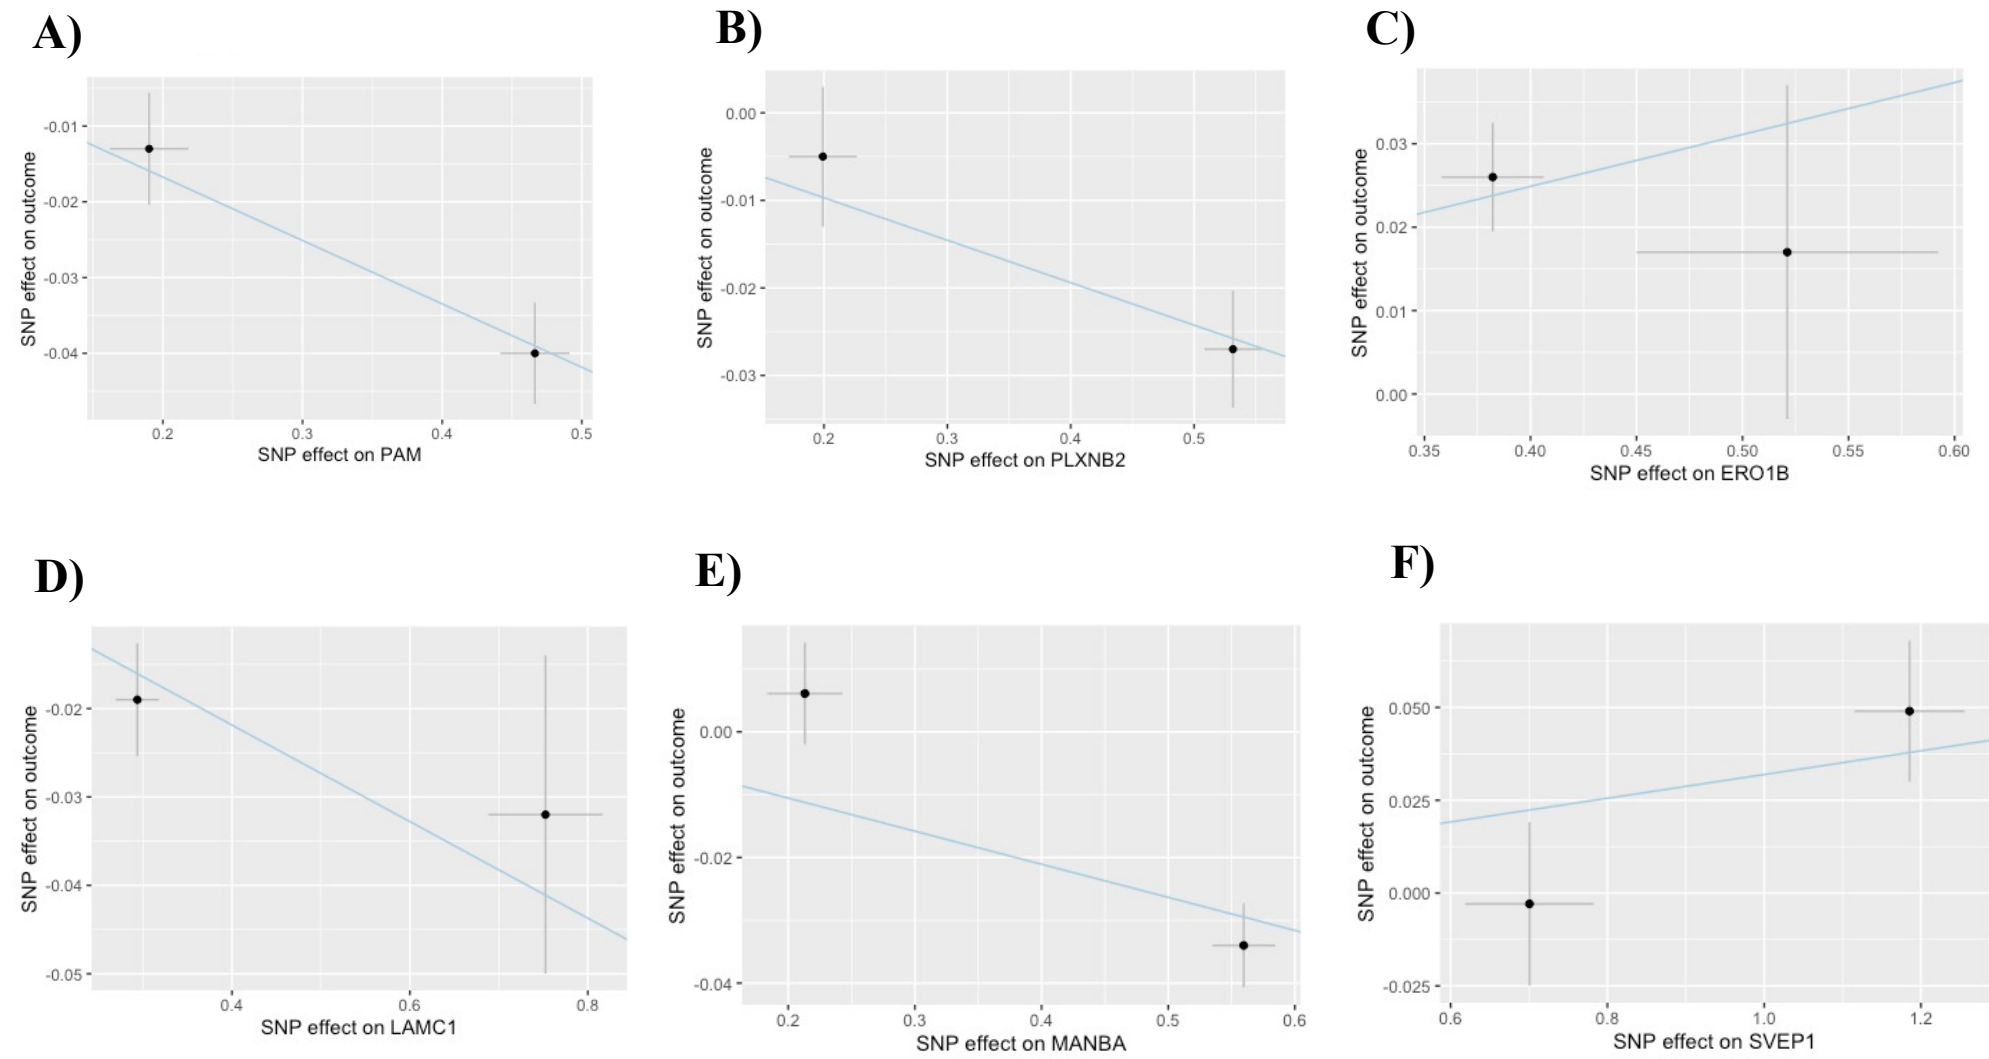

**G)**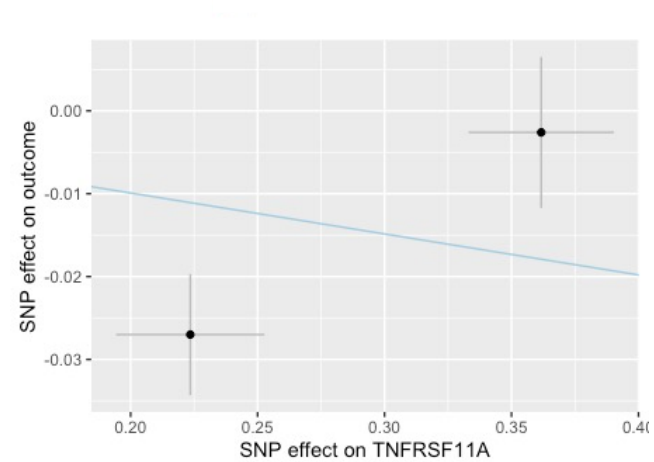**H)**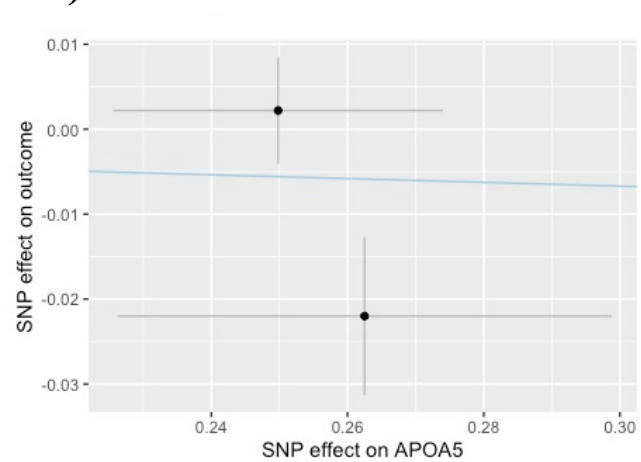**I)**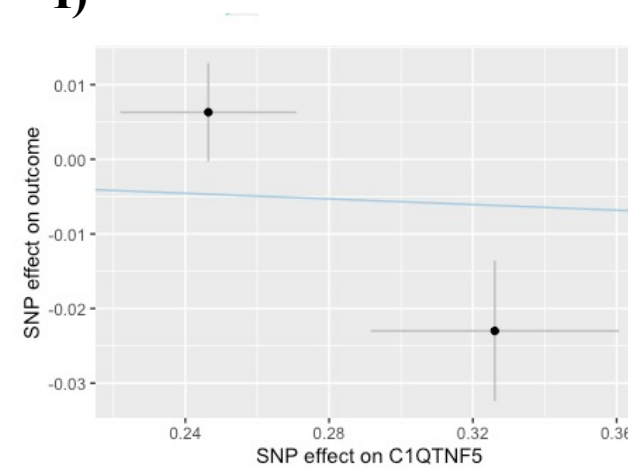**J)**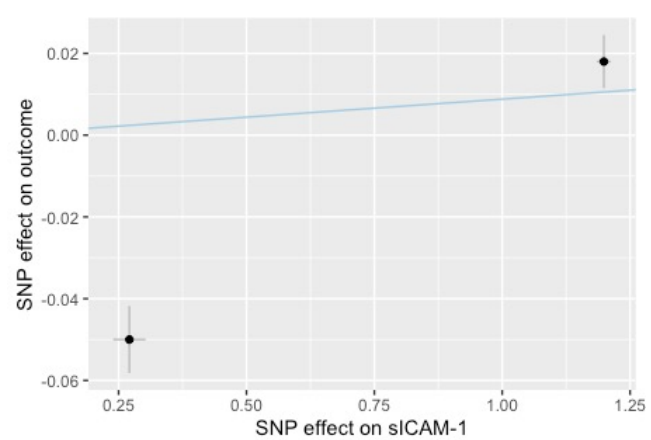**K)**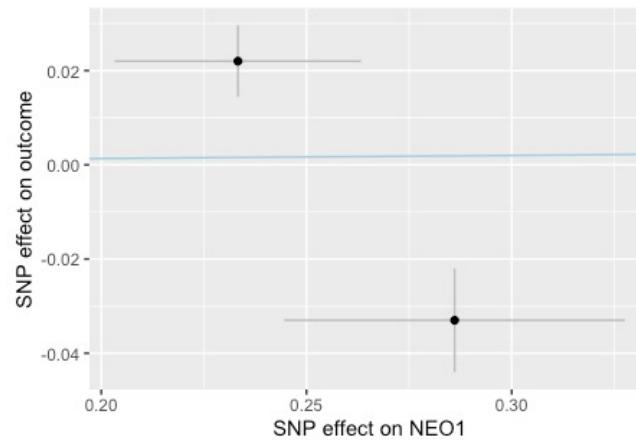

Supplement: Supplementary file 1 [file 1]
